# Supplementary material for: Infection of neonatal mice with the murine norovirus strain WU23 is a robust model to study norovirus pathogenesis
Source: Research Square preprint supplement (doi:10.21203/rs.3.rs-2002263/v1), 2022-09-22
Supplement: Supplementary file 1 [file b2bbfe911136539648697249.xlsx]

## Sheet: Fig. 4a
dpi	mock	MNV1	WU23	CR6
0	9	20	12	15
0.25	7	16	12	15
0.5	7	11	14	10
1	8	16	11	12
2	8	15	15	17
3	8	13	11	12
4	13	9	20	ND
5	7	9	18	10
10	6	10	11	12

## Sheet: Fig. 4b
dpi	mock	MNV1	WU23	CR6
0.25	2 (7)	8 (16)	7 (12)	6 (15)
0.5	4 (7)	8 (11)	7 (10)	8 (10)
1	3 (8)	8 (16)	7 (10)	8 (12)
2	7 (8)	16 (18)	8 (10)	12 (17)
3	5 (8)	8 (13)	10 (11)	5 (12)
4	6 (13)	4 (9)	10 (19)	ND
5	4 (7)	5 (9)	8 (18)	3 (10)
10	3 (6)	7 (10)	4 (11)	8 (12)
	*For each condition, the number of mice tested for fecal consistency is shown in paranthesis while the number of values reported is shown in front of the parentheses. These values are different because some mice did not defecate so fecal consistency could not be evaluated.

## Sheet: Fig.7a 
	mock	WU23
B6	5 (18)	3 (7)
Ifnar1-/-	7 (17)	12(15)
	*For each condition, the number of mice tested for fecal consistency is shown in paranthesis while the number of values reported is shown in front of the parentheses. These values are different because some mice did not defecate so fecal consistency could not be evaluated.

## Sheet: Fig. 7b
	mock	WU23
B6	5 (18)	22 (24)
Ifnlr1-/-	8 (16)	13 (18)
Ifnl2/3-/-	11 (20)	13 (23)
	*For each condition, the number of mice tested for fecal consistency is shown in paranthesis while the number of values reported is shown in front of the parentheses. These values are different because some mice did not defecate so fecal consistency could not be evaluated.

## Sheet: Fig. 8a
	mock	WU23	MNV1	CR6
B6	24	24	22	12
Ifnar1-/-	24	24	22	12
Ifnlr1-/-	24	24	22	12

## Sheet: Fig. 8b
	mock	WU23	MNV1	CR6
B6	16	16	14	12
Ifnar1-/-	16	16	14	12
Ifnlr1-/-	16	16	10	12
